# Supplementary material for: Demonstration of the usefulness of epigenetic cancer risk prediction by a multicentre prospective cohort study
Source: HighWire-hosted journal article supplement (doi:10.1136/gutjnl-2014-307094), 2014-06-02
Supplement: gutjnl-2014-307094supp_tables.pdf [file gutjnl-2014-307094supp_tables.pdf]

**Supplementary table 1 Multivariate-adjusted HRs (95%CI) for a metachronous gastric cancer according to DNA methylation levels of the three genes (Q1-Q3 vs Q4)**

| Variable                                      | Quartile of DNA methylation level |                  |
|-----------------------------------------------|-----------------------------------|------------------|
|                                               | Q1-Q3                             | Q4 (highest)     |
| No. of patients                               | 587                               | 195              |
| <i>Authentic metachronous gastric cancers</i> |                                   |                  |
| <i>miR-124a-3</i>                             |                                   |                  |
| No. of events                                 | 44                                | 22               |
| HR* (95% CI)                                  | 1                                 | 1.95 (1.11-3.43) |
| <i>P</i> value                                |                                   | <b>0.021</b>     |
| <i>EMXI</i>                                   |                                   |                  |
| No. of events                                 | 45                                | 21               |
| HR* (95% CI)                                  | 1                                 | 1.50 (0.85-2.62) |
| <i>P</i> value                                |                                   | 0.16             |
| <i>NKX6-1</i>                                 |                                   |                  |
| No. of events                                 | 45                                | 21               |
| HR* (95% CI)                                  | 1                                 | 1.42 (0.82-2.45) |
| <i>P</i> value                                |                                   | 0.21             |
| <i>All metachronous gastric cancers</i>       |                                   |                  |
| <i>miR-124a-3</i>                             |                                   |                  |
| No. of events                                 | 57                                | 24               |
| HR* (95% CI)                                  | 1                                 | 1.62 (0.96-2.74) |
| <i>P</i> value                                |                                   | 0.072            |
| <i>EMXI</i>                                   |                                   |                  |
| No. of events                                 | 55                                | 26               |
| HR* (95% CI)                                  | 1                                 | 1.52 (0.92-2.52) |
| <i>P</i> value                                |                                   | 0.10             |
| <i>NKX6-1</i>                                 |                                   |                  |
| No. of events                                 | 58                                | 23               |
| HR* (95% CI)                                  | 1                                 | 1.25 (0.75-2.08) |
| <i>P</i> value                                |                                   | 0.39             |

\*Adjusted for hospital, gender, and age (<50, 50-59, 60-69, or ≥70), *H. pylori* infection before the enrollment (positive or negative), pepsinogen index, past history of endoscopic resection (0, 1, 2, or 3 times), pack-years of smoking (0, 1-39, or ≥40), and green vegetable intake (≤2 days per week, 3-4 days per week, or almost daily).

**Supplementary table 2 Difference in methylation levels of three genes between patients with and without *H. pylori* infection before the enrollment**

| Variable                                         | Median DNA methylation level |                              |             |                              |               |                              |
|--------------------------------------------------|------------------------------|------------------------------|-------------|------------------------------|---------------|------------------------------|
|                                                  | <i>miR-124a-3</i>            | <i>P</i> for the difference* | <i>EMX1</i> | <i>P</i> for the difference* | <i>NKX6-1</i> | <i>P</i> for the difference* |
| <i>H. pylori</i> infection before the enrollment |                              |                              |             |                              |               |                              |
| Negative (n=385)                                 | 68.6                         | <0.0001                      | 62.1        | 0.0040                       | 68.5          | <0.0001                      |
| Positive (n=397)                                 | 78.1                         |                              | 72.0        |                              | 74.2          |                              |

\*Wilcoxon rank sum test

**Supplementary table 3** Analysis stratified by *H. pylori* infection status before the enrollment for the risk of authentic metachronous gastric cancer according to *miR-124a-3* methylation level

| Variable                                         | Quartile of <i>miR-124a-3</i> methylation level |                  |                  |                  | <i>P</i> for trend |
|--------------------------------------------------|-------------------------------------------------|------------------|------------------|------------------|--------------------|
|                                                  | Q1 (lowest)                                     | Q2               | Q3               | Q4 (highest)     |                    |
| <i>H. pylori</i> infection before the enrollment |                                                 |                  |                  |                  |                    |
| Negative                                         |                                                 |                  |                  |                  |                    |
| No. of events                                    | 7                                               | 13               | 10               | 11               |                    |
| HR* (95% CI)                                     | 1                                               | 1.70 (0.61-4.71) | 1.38 (0.48-3.95) | 2.43 (0.81-7.32) | 0.19               |
| Positive                                         |                                                 |                  |                  |                  |                    |
| No. of events                                    | 5                                               | 4                | 5                | 11               |                    |
| HR* (95% CI)                                     | 1                                               | 0.36 (0.08-1.69) | 0.73 (0.17-3.06) | 1.32 (0.37-4.77) | 0.29               |

\*Adjusted for center by stratification, gender, age (40-49, 50-59, 60-69, or  $\geq 70$ ), pepsinogen index, and past history of endoscopic resection (0, 1, 2, or 3 times), pack-years of smoking (0, 1-19, 20-39, or  $\geq 40$ ), and green vegetable intake ( $\leq 2$  days per week, 3-4 days per week, or almost daily).

**Supplementary table 4 Analysis stratified by the past history of ER and the years since the first ER to enrollment for the risk of authentic metachronous gastric cancer according to *miR-124a-3* methylation level**

| Variable                        | Quartile of <i>miR-124a-3</i> methylation level |                  |                  |                  | P for trend |
|---------------------------------|-------------------------------------------------|------------------|------------------|------------------|-------------|
|                                 | Q1 (lowest)                                     | Q2               | Q3               | Q4 (highest)     |             |
| <i>Past history of ER</i>       |                                                 |                  |                  |                  |             |
| <2 times                        |                                                 |                  |                  |                  |             |
| No. of events                   | 8                                               | 15               | 14               | 19               |             |
| HR* (95% CI)                    | 1                                               | 1.89 (0.78-4.61) | 1.47 (0.59-3.66) | 2.55 (1.02-6.33) | 0.09        |
| ≥2 times                        |                                                 |                  |                  |                  |             |
| No. of events                   | 4                                               | 2                | 1                | 3                |             |
| HR† (95% CI)                    | 1                                               | 0.18 (0.002-18)  | 3.69 (0.02-731)  | 3.67 (0.02-712)  | 0.15        |
| <i>Years since the first ER</i> |                                                 |                  |                  |                  |             |
| > 5 years                       |                                                 |                  |                  |                  |             |
| No. of events                   | 4                                               | 4                | 5                | 9                |             |
| HR‡ (95% CI)                    | 1                                               | 0.38 (0.08-1.83) | 0.80 (0.20-3.22) | 1.45 (0.36-5.86) | 0.30        |
| ≤ 5 years                       |                                                 |                  |                  |                  |             |
| No. of events                   | 8                                               | 13               | 10               | 13               |             |
| HR‡ (95% CI)                    | 1                                               | 1.77 (0.68-4.68) | 1.51 (0.52-4.38) | 2.48 (0.86-7.11) | 0.14        |

\* Adjusted for center by stratification, gender, age (40-49, 50-59, 60-69, or ≥70), *H. pylori* infection before the enrollment (positive or negative), pepsinogen index, and past history of endoscopic resection (0 or 1 time), pack-years of smoking (0, 1-19, 20-39, or ≥40), and green vegetable intake (≤2 days per week, 3-4 days per week, or almost daily)

† Adjusted for center by stratification, gender, age (40-49, 50-59, 60-69, or ≥70), *H. pylori* infection before the enrollment (positive or negative), pepsinogen index, and past history of endoscopic resection (2 or 3 times), pack-years of smoking (0, 1-19, 20-39, or ≥40), and green vegetable intake (≤2 days per week, 3-4 days per week, or almost daily)

‡ Adjusted for center by stratification, gender, age (40-49, 50-59, 60-69, or ≥70), *H. pylori* infection before the enrollment (positive or negative), pepsinogen index, and past history of endoscopic resection (0, 1, 2, or 3 times), pack-years of smoking (0, 1-19, 20-39, or ≥40), and green vegetable intake (≤2 days per week, 3-4 days per week, or almost daily).

**Supplementary table 5** Years since the first ER to the enrollment according to quartiles of DNA methylation levels of three marker genes

| Variable                                      | Quartile of DNA methylation level |               |               |               |
|-----------------------------------------------|-----------------------------------|---------------|---------------|---------------|
|                                               | Q1 (lowest)                       | Q2            | Q3            | Q4 (highest)  |
| <i>Years since the first ER, median (IQR)</i> |                                   |               |               |               |
| <i>miR-124a-3</i>                             | 2.6 (1.2-4.9)                     | 2.1 (1.0-4.7) | 2.7 (1.0-5.1) | 2.9 (1.0-4.9) |
| <i>EMX1</i>                                   | 2.9 (1.2-5.0)                     | 2.0 (1.0-4.3) | 3.2 (1.0-5.3) | 2.2 (0.8-4.6) |
| <i>NKX6-1</i>                                 | 2.5 (1.1-4.8)                     | 2.7 (1.0-5.0) | 2.3 (0.7-4.7) | 2.9 (1.0-5.0) |

IQR, interquartile range
